# Supplementary material
Source: Springer Nature journal article supplement (https://www.springermedizin.de/resource/supplementary/13229_2013_83_MOESM7_ESM.pdf/9676132)

**A**

## Home Cage Scan

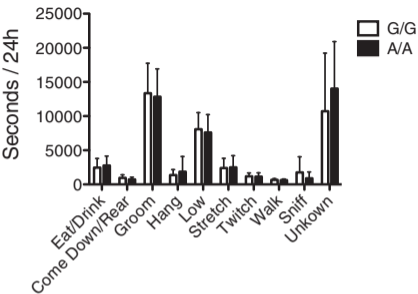**B**

## Home Cage Scan

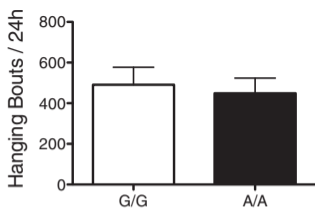**C**

## Y Maze

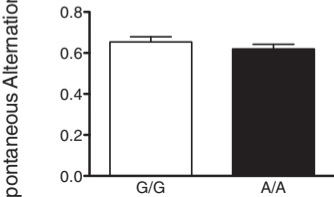**D**

## von Frey Tactile Sensitivity

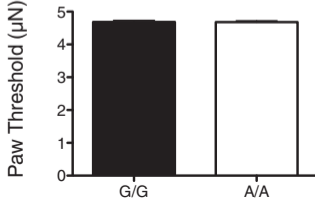

Supplement: MOESM7 [file 9676132]
